# Supplementary material for: A tri(potassium sulfonate) derivative of perchlorotriphenylmethyl radical (PTM) as a stable water soluble radical-scavenger of the hydroxyl radical more powerful than 5,5-dimethyl-1-pyrroline-N-oxide
Source: Royal Society of Chemistry journal article supplement (doi:10.1039/c3ra41499j), 2013-01-01
Supplement: c3ra41499j.pdf [file c3ra41499j.pdf]

A tri(potassium sulfonate) derivative of perchlorotriphenylmethyl radical (PTM) as a stable water soluble radical-scavenger of the hydroxyl radical more powerful than 5,5-dimethyl-1-pyrroline-N-oxide

Juan Antonio Mesa, Sergei Chávez, Lluís Fajarí, Josep Lluís Torres, Luis Juliá\*

*Departament de Química Biològica i Modelització Molecular, Institut de Química Avançada de Catalunya (IQAC-CSIC), Jordi Girona 18-26, 08034 Barcelona, Spain.*

## SUPPLEMENTARY MATERIAL

| <b><u>Table of contents</u></b>                               | <b><u>page</u></b> |
|---------------------------------------------------------------|--------------------|
| HRMS-ESI(-) of <b>4</b>                                       | 2                  |
| Kinetics of the stability of DMPO-OH                          | 2                  |
| Infrared spectrum of quinone methide <b>2</b>                 | 3                  |
| <sup>13</sup> C NMR (CD <sub>3</sub> OD, 400 MHz) of <b>2</b> | 3                  |
| UV-vis (H <sub>2</sub> O) of <b>2</b>                         | 4                  |
| HRMS-ESI (-) of <b>2</b>                                      | 4                  |

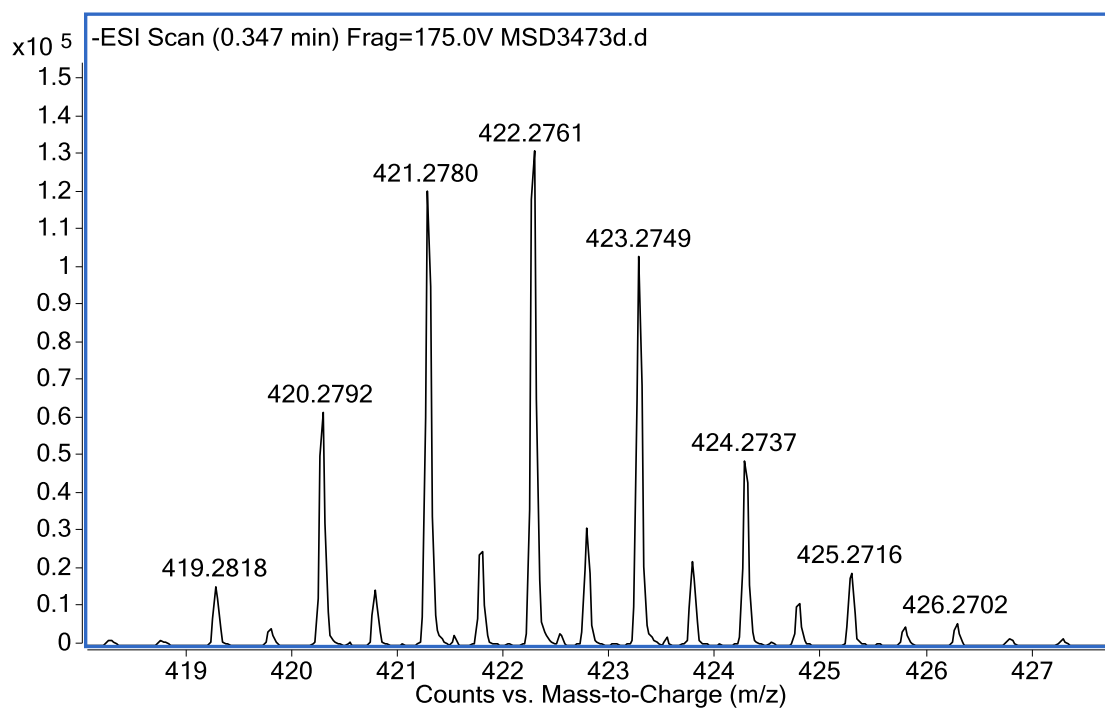

**Figure S1.** HRMS-ESI (-) spectrum of 4-methoxy derived radical **4**

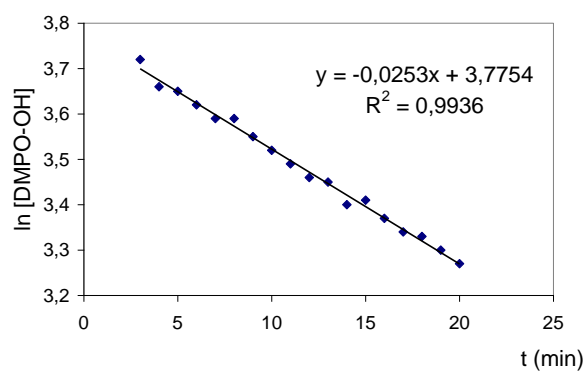

**Figure S2.** Estimation of the first order kinetics of the stability of the radical adduct DMPO-OH

**4-[Bis(2,3,5,6-tetrachloro-4-hydroxysulphonylphenyl)methylene]-2,3,5,6-tetrachlorocyclohexadien-1-one (2)**

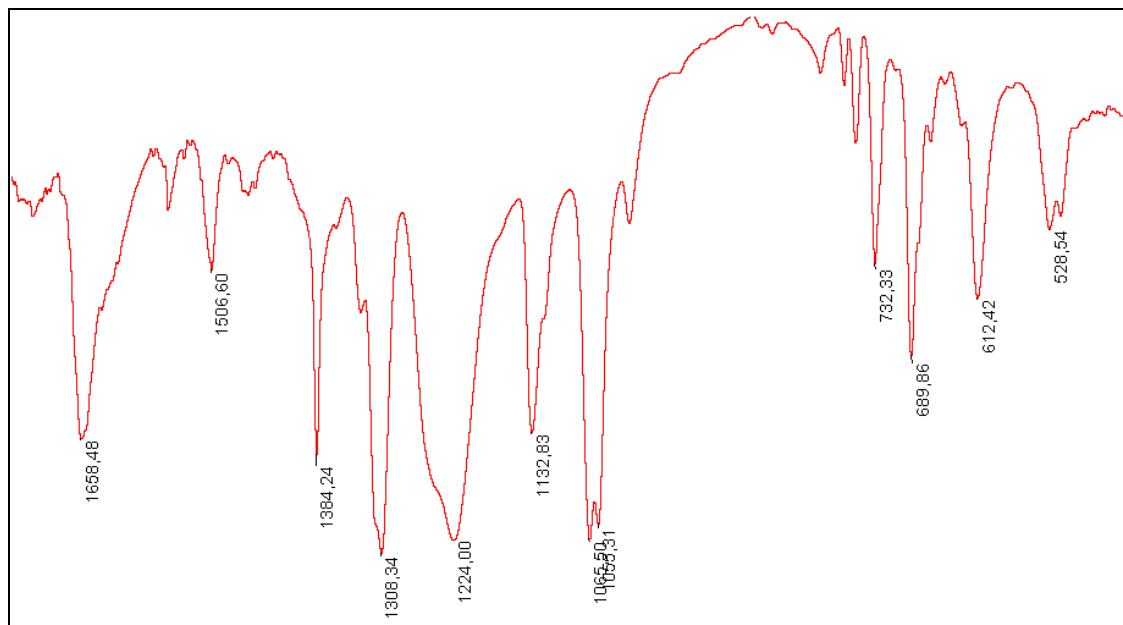

**Figure S3.** Infrared spectrum of **2**

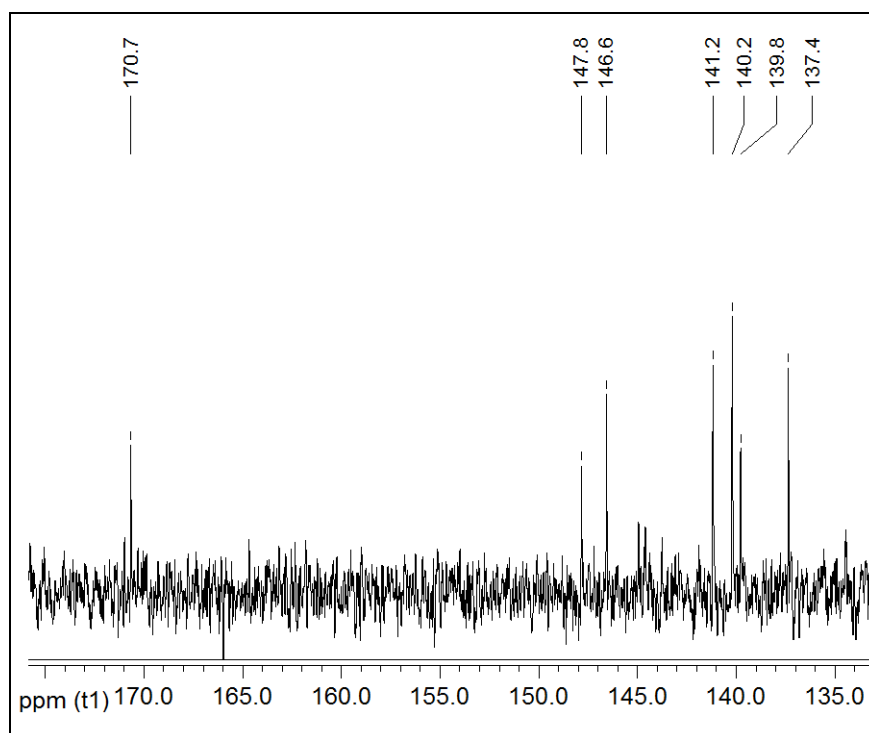

**Figure S4.** <sup>13</sup>C NMR (CD<sub>3</sub>OD, 400 MHz) spectrum of **2**

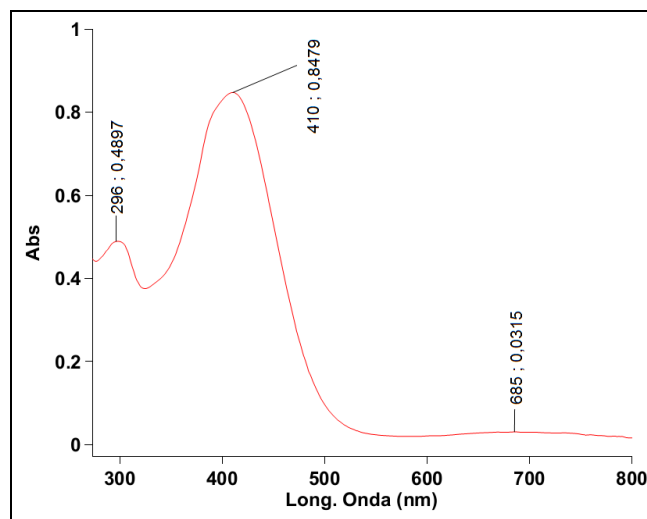

**Figure S5.** UV-vis (H<sub>2</sub>O) spectrum of **2**

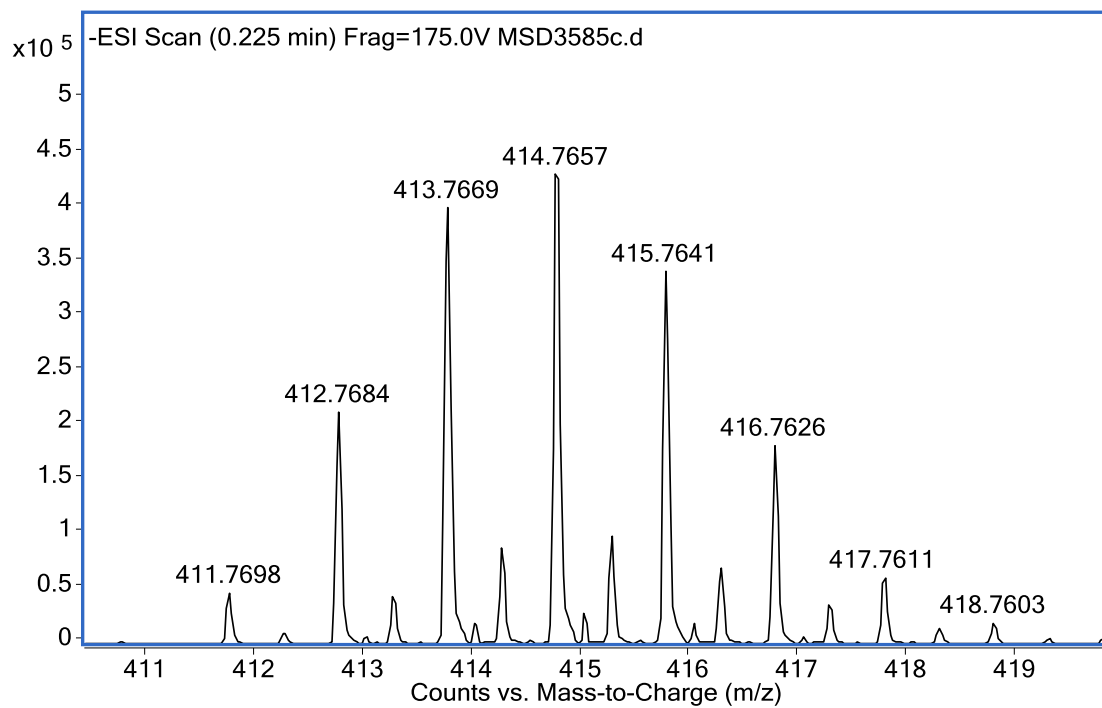

**Figure S6.** HRMS-ESI (-) spectrum of **2**
